# Supplementary material for: Characterization of the Noncanonical Regulatory and Transporter Genes in Atratumycin Biosynthesis and Production in a Heterologous Host
Source: PubMed Central journal article supplement (PMC6835768; doi:10.3390/md17100560), 2019-09-29
Supplement: marinedrugs-17-00560-s001.pdf [file marinedrugs-17-00560-s001.pdf]

## Supplementary Materials

# Characterization of the Noncanonical Regulatory and Transporter Genes in Atratumycin Biosynthesis and Production in a Heterologous Host

Zhijie Yang<sup>1,2</sup>, Xin Wei<sup>1,2</sup>, Jianqiao He<sup>1,2</sup>, Changli Sun<sup>1</sup>, Jianhua Ju<sup>1,2,\*</sup> and Junying Ma<sup>1,\*</sup>

<sup>1</sup> CAS Key Laboratory of Tropical Marine Bio-resources and Ecology, Guangdong Key Laboratory of Marine Materia Medica, RNAM Center for Marine Microbiology, South China Sea Institute of Oceanology, Chinese Academy of Sciences, Guangzhou, 510301, China

<sup>2</sup> College of Earth and Planetary Sciences, University of Chinese Academy of Sciences, Beijing, 100049, China.

\* Correspondence: [jjju@scsio.ac.cn](mailto:jjju@scsio.ac.cn); Tel.: (+86)20-89023028 (J.J.); [majunying@scsio.ac.cn](mailto:majunying@scsio.ac.cn); Tel.: (+86)20-34066449 (J.M.)

| <b>Item Name</b> | <b>Contents/Description</b>                                           | <b>Page</b> |
|------------------|-----------------------------------------------------------------------|-------------|
| <b>Table S1</b>  | Summary of strains and plasmids used in this study.                   | S1-S2       |
| <b>Table S2</b>  | Summary of primers used in this study.                                | S2-S3       |
| <b>Figure S1</b> | Disruption of <i>atr1</i> in WT <i>S. atratus</i> SCSIO ZH16NS-80S.   | S3          |
| <b>Figure S2</b> | Disruption of <i>atr2</i> in WT <i>S. atratus</i> SCSIO ZH16NS-80S.   | S4          |
| <b>Figure S3</b> | Disruption of <i>atr29</i> in WT <i>S. atratus</i> SCSIO ZH16NS-80S.  | S4          |
| <b>Figure S4</b> | Disruption of <i>atr30</i> in WT <i>S. atratus</i> SCSIO ZH16NS-80S.  | S5          |
| <b>Figure S5</b> | Disruption of <i>atr32</i> in WT <i>S. atratus</i> SCSIO ZH16NS-80S.  | S5          |
| <b>Figure S6</b> | The quantitative HPLC standard curve for atratumycin.                 | S6          |
| <b>Figure S7</b> | PCR verification of PAC434 containing entire <i>atr</i> gene cluster. | S6          |

**Table S1.** Summary of strains and plasmids used in this study.

| Strains/<br>plasmids                  | Relevant phenotype                                                                                                                      | Source/<br>[Ref] |
|---------------------------------------|-----------------------------------------------------------------------------------------------------------------------------------------|------------------|
| <i>S. atratus</i> SCSIO<br>ZH16NS-80S | Wild-type (WT) producer of atartumycin                                                                                                  | [1]              |
| $\Delta atr1$                         | <i>S. atratus</i> SCSIO ZH16NS with a 624 bp of <i>atr1</i> substituted by <i>aac(3)IV</i> +OriT                                        | This work        |
| $\Delta atr2$                         | <i>S. atratus</i> SCSIO ZH16NS with a 315 bp of <i>atr2</i> substituted by <i>aac(3)IV</i> +OriT                                        | This work        |
| $\Delta atr29$                        | <i>S. atratus</i> SCSIO ZH16NS with a 729 bp of <i>atr29</i> substituted by <i>aac(3)IV</i> +OriT                                       | This work        |
| $\Delta atr30$                        | <i>S. atratus</i> SCSIO ZH16NS with a 447 bp of <i>atr30</i> substituted by <i>aac(3)IV</i> +OriT                                       | This work        |
| $\Delta atr32$                        | <i>S. atratus</i> SCSIO ZH16NS with a 612 bp of <i>atr32</i> substituted by <i>aac(3)IV</i> +OriT                                       | This work        |
| <b><i>E. coli</i></b>                 |                                                                                                                                         |                  |
| Bw25113                               | K-12 derivative: <i>araBAD</i> , <i>rhaBAD</i>                                                                                          | [2]              |
| ET12567                               | <i>dam</i> , <i>dcm</i> , <i>hsdM</i> , <i>hsdS</i> , <i>hsdR</i> , <i>catR</i> , <i>tetR</i>                                           | [3]              |
| <b>Plasmids</b>                       |                                                                                                                                         |                  |
| pIJ773                                | P1-FRT-oriT- <i>aac(3)IV</i> -FRT-P2                                                                                                    | [4]              |
| pIJ790                                | $\lambda$ -RED ( <i>gam bet exo</i> ) CmlR <i>araCrep101ts</i>                                                                          | [4]              |
| pUZ8002                               | <i>tra</i> , <i>neo</i> , RP4                                                                                                           | [5]              |
| pL646ATE                              | <i>Tsr</i> , <i>acc(3)IV</i> , <i>ermE</i> *P                                                                                           | [6]              |
| cosmid-56G                            | A cosmid which contains partial atratumycin biosynthesis cluster                                                                        | This work        |
| cosmid-198F                           | A cosmid which contains partial atratumycin biosynthesis cluster                                                                        | This work        |
| cosmid-1610C                          | A cosmid which contains partial atratumycin biosynthesis cluster                                                                        | This work        |
| PAC-434C                              | A cosmid which contains complete actinomycin biosynthesis cluster                                                                       | This work        |
| $p\Delta atr1$                        | A 624 bp fragment in <i>atr1</i> in cosmid 56G was substituted by the <i>aac(IV)</i> +OriT cassette using the PCR-targeting strategy    | This work        |
| $p\Delta atr2$                        | A 315 bp fragment in <i>atr2</i> in cosmid 56G was substituted by the <i>aac(IV)</i> +OriT cassette using the PCR-targeting strategy    | This work        |
| $p\Delta atr29$                       | A 729 bp fragment in <i>atr29</i> in cosmid 1610C was substituted by the <i>aac(IV)</i> +OriT cassette using the PCR-targeting strategy | This work        |
| $p\Delta atr30$                       | A 447 bp fragment in <i>atr30</i> in cosmid 1610C was substituted by the <i>aac(IV)</i> +OriT cassette using the PCR-targeting strategy | This work        |
| $p\Delta atr32$                       | A 612 bp fragment in <i>atr32</i> in cosmid 1610C was substituted by the <i>aac(IV)</i> +OriT cassette using the PCR-targeting strategy | This work        |
| ZH16NS-80S:: <i>atr1</i>              | An integrated vector pL646ATE with complete <i>atr1</i> for over-expression                                                             | This work        |

|                           |                                                                              |           |
|---------------------------|------------------------------------------------------------------------------|-----------|
| ZH16NS-80S:: <i>atr2</i>  | An integrated vector pL646ATE with complete <i>atr2</i> for over-expression  | This work |
| ZH16NS-80S:: <i>atr29</i> | An integrated vector pL646ATE with complete <i>atr29</i> for over-expression | This work |
| ZH16NS-80S:: <i>atr30</i> | An integrated vector pL646ATE with complete <i>atr30</i> for over-expression | This work |
| ZH16NS-80S:: <i>atr32</i> | An integrated vector pL646ATE with complete <i>atr32</i> for over-expression | This work |

Table S2. Summary of primers used in this study.

| Primer Name          | Sequence (5'→3')                                            | purpose                             |
|----------------------|-------------------------------------------------------------|-------------------------------------|
| DEL- <i>atr1</i> -F  | gaaagcgcgttgcttcaggcccgtgcgctgatcgaatcattccggggatccgacgacc  | For disrupting <i>atr1</i>          |
| DEL- <i>atr1</i> -R  | ctggaaacgggagttggccccgagctcgcgcgatgatctctgtaggctggagctgcttc |                                     |
| DEL- <i>atr2</i> -F  | gaactcggctcctgtgcaccaggcgatgctcgacgacattccggggatccgacgacc   | For disrupting <i>atr2</i>          |
| DEL- <i>atr2</i> -R  | gacgtaccggcgataggtgcgaccgagacggagagctctgtaggctggagctgcttc   |                                     |
| DEL- <i>atr29</i> -F | gagggaacggtcctcggactgctcgcccccaacggtgacattccggggatccgacgacc | For disrupting <i>atr29</i>         |
| DEL- <i>atr29</i> -R | gcgccgaacggcgaaactccgctatgtcgattccgagttctgtaggctggagctgcttc |                                     |
| DEL- <i>atr30</i> -F | atgatgtcaacatctcccagacggccctggcgctgctattccggggatccgacgacc   | For disrupting <i>atr30</i>         |
| DEL- <i>atr30</i> -R | ccccgtaccgatgccacggtgggattgccgaagagttgtgtaggctggagctgcttc   |                                     |
| DEL- <i>atr32</i> -F | gccaccgacggccccagatctacacctatgtctcccagattccggggatccgacgacc  | For disrupting <i>atr32</i>         |
| DEL- <i>atr32</i> -R | catcggggaggacgcccgtccaggcggcggtcccgtgtaggctggagctgcttc      |                                     |
| COM- <i>atr1</i> -F  | aaaacatgatgaagacttccacgtctaaac                              | For cloning complete <i>atr1</i>    |
| COM- <i>atr1</i> -R  | aaaaactagttcatgacgtcgtgattctctg                             |                                     |
| COM- <i>atr2</i> -F  | aaaacatgatgaccgattcctattctgtc                               | For cloning complete <i>atr2</i>    |
| COM- <i>atr2</i> -R  | aaaaactagtctacaggaagctgccagtgc                              |                                     |
| COM- <i>atr29</i> -F | aaaacatgatgacgaacgccatcgaggc                                | For cloning complete <i>atr29</i>   |
| COM- <i>atr29</i> -R | aaaaactagttcacgccgattccctctccc                              |                                     |
| COM- <i>atr30</i> -F | aaaacataggtgaccgagacactcagtgc                               | For cloning complete <i>Atr30</i>   |
| COM- <i>atr30</i> -R | aaaaactagttcagcgagcggtcgccg                                 |                                     |
| COM- <i>atr32</i> -F | aaaacataggtgacggcttcgacc                                    | For cloning complete <i>Atr32</i>   |
| COM- <i>atr32</i> -R | aaaaactagtctacatcgactccctga                                 |                                     |
| ID- <i>atr1</i> -F   | gccaataccgccgaaggcatc                                       | For verifying mutant $\Delta atr1$  |
| ID- <i>atr1</i> -R   | cagacctctccacggctc                                          |                                     |
| ID- <i>atr2</i> -F   | cggaaagcagatcgaacttcgg                                      | For verifying mutant $\Delta atr2$  |
| ID- <i>atr2</i> -R   | caggagcgccatgatctccgc                                       |                                     |
| ID- <i>atr29</i> -F  | gccatcgaggccgaaggctc                                        | For verifying mutant $\Delta atr29$ |
| ID- <i>atr29</i> -R  | gacgtcgtcagcgaagggcg                                        |                                     |

|                       |                        |                                                    |
|-----------------------|------------------------|----------------------------------------------------|
| ID- <i>atr30</i> -F   | caggagtacatcatggcgggc  | For verifying mutant $\Delta$ <i>atr30</i>         |
| ID- <i>atr30</i> -R   | cagcgacatcacgatgggggtg |                                                    |
| ID- <i>atr32</i> -F   | gaagcagcgcaccgtcctcg   | For verifying mutant $\Delta$ <i>atr32</i>         |
| ID- <i>atr32</i> -R   | gacttgccggtacctgcagc   |                                                    |
| ID- <i>atr19</i> -F   | gcgggtggacctggcgaag    | For screening PAC clones containing <i>atr</i> BGC |
| ID- <i>atr19</i> -R   | gcagccgtcgggagcgacg    |                                                    |
| ID- <i>orf(-2)</i> -F | cccatacgccgctacgaacgc  | For screening PAC clones containing <i>atr</i> BGC |
| ID- <i>orf(-2)</i> -R | ccgttgcaagtggcacgagttc |                                                    |
| ID- <i>orf(+2)</i> -F | gaaatggtgctggagggtcacg | For screening PAC clones containing <i>atr</i> BGC |
| ID- <i>orf(+2)</i> -R | ctagatccgccgctccgcacc  |                                                    |
| ID-com-F              | gatctgaccgacgcggtccac  | For verifying complete gene fragments              |
| ID-com-R              | gcgcggtcgatccccgatg    |                                                    |

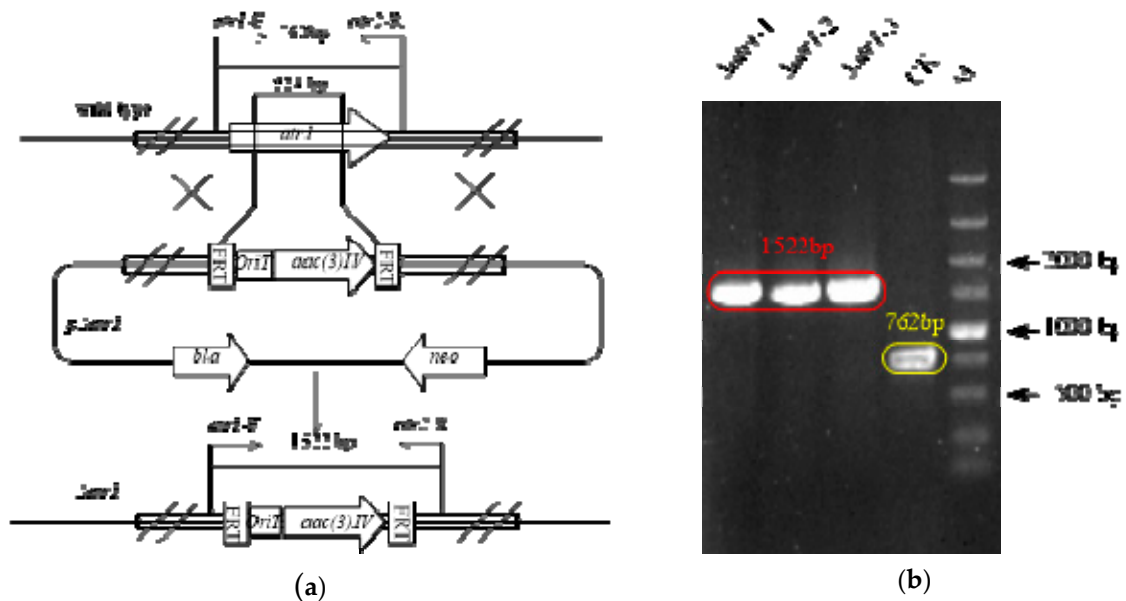

**Figure S1.** Disruption of *atr1* in *S. atratus* SCSIO ZH16NS-80S via PCR-targeting. **a)** Schematic representation for disruption of *atr1*. **b)** PCR analysis of the control strain (*S. atratus* SCSIO ZH16NS-80S) and the *atr1* mutants carried out using primers listed in **Table S2**. M: DNA molecular ladder; CK: using the genomic DNA of *S. atratus* SCSIO ZH16NS-80S as template,  $\Delta$ *atr1* (1-3): using the genomic DNA of three different colonies of  $\Delta$ *atr1* mutant as template.

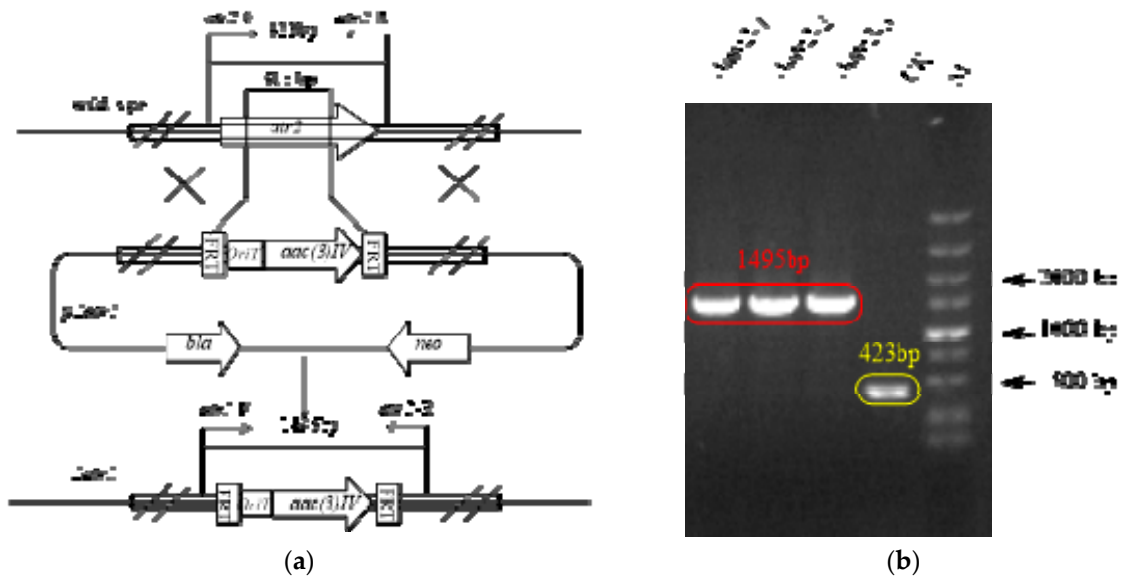

**Figure S2.** Disruption of *atr2* in *S. atratus* SCSIO ZH16NS-80S via PCR-targeting. **a)** Schematic representation for disruption of *atr2*. **b)** PCR analysis of the control strain (*S. atratus* SCSIO ZH16NS-80S) and the *atr2* mutants carried out using primers listed in **Table S2**. M: DNA molecular ladder; CK: using the genomic DNA of *S. atratus* SCSIO ZH16NS-80S as template,  $\Delta atr2$  (1-3): using the genomic DNA of three different colonies of  $\Delta atr2$  mutant as template.

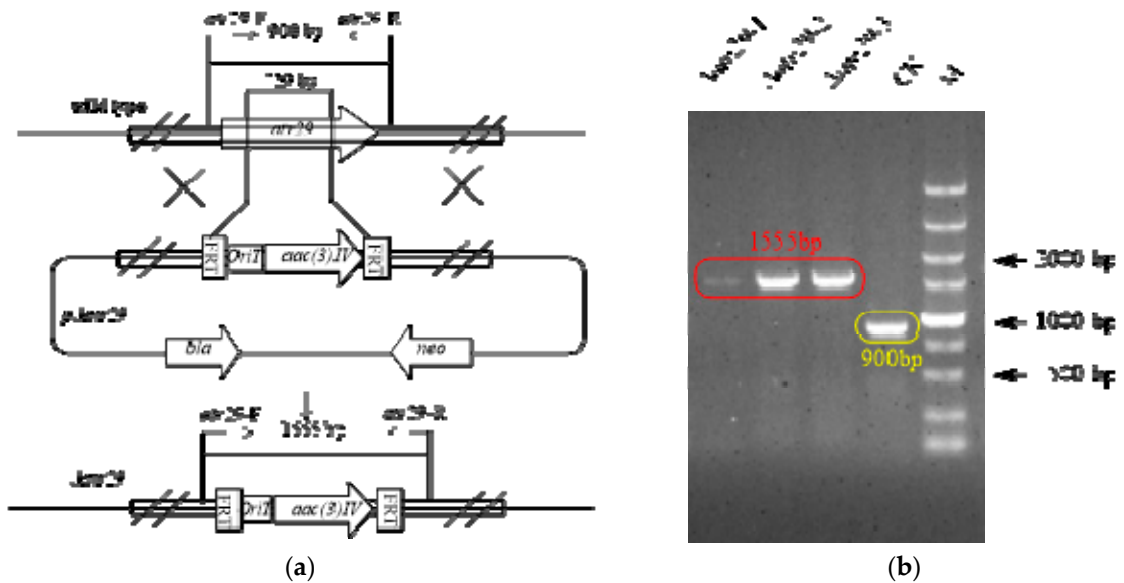

**Figure S3.** Disruption of *atr29* in *S. atratus* SCSIO ZH16NS-80S via PCR-targeting. **a)** Schematic representation for disruption of *atr29*. **b)** PCR analysis of the control strain (*S. atratus* SCSIO ZH16NS-80S) and the *atr29* mutants carried out using primers listed in **Table S2**. M: DNA molecular ladder; CK: using the genomic DNA of *S. atratus* SCSIO ZH16NS-80S as template,  $\Delta atr29$  (1-3): using the genomic DNA of three different colonies of  $\Delta atr29$  mutant as template.

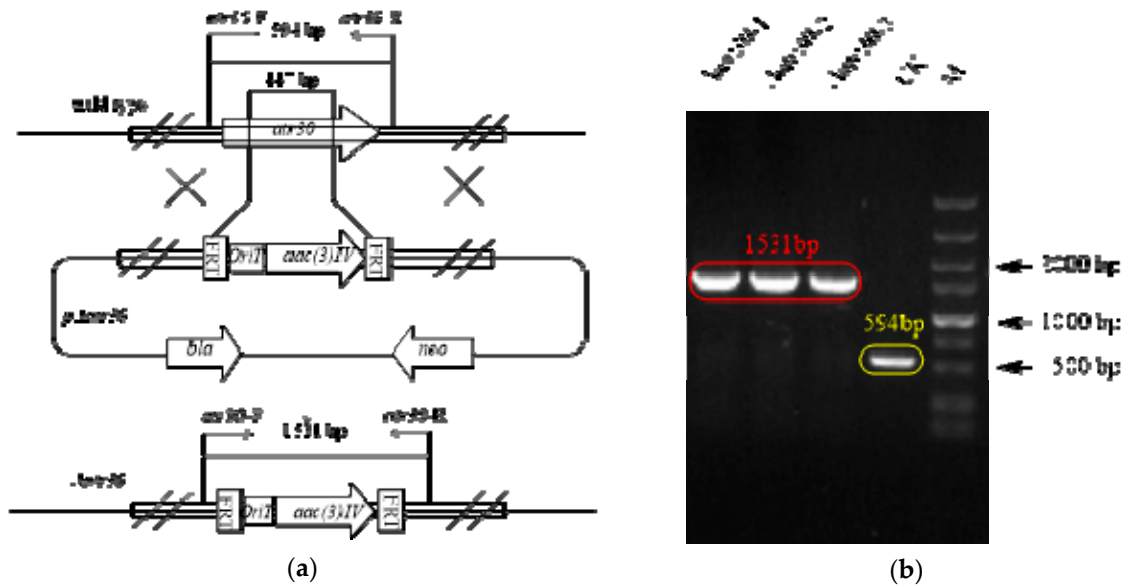

**Figure S4.** Disruption of *atr30* in *S. atratus* SCSIO ZH16NS-80S via PCR-targeting. **a)** Schematic representation for disruption of *atr30*. **b)** PCR analysis of the control strain (*S. atratus* SCSIO ZH16NS-80S) and the *atr30* mutants carried out with the primers listed in **Table S2**. M: DNA molecular ladder; CK: using the genomic DNA of *S. atratus* SCSIO ZH16NS-80S as template,  $\Delta atr30$  (1-3): using the genomic DNA of three different colonies of  $\Delta atr30$  mutant as template.

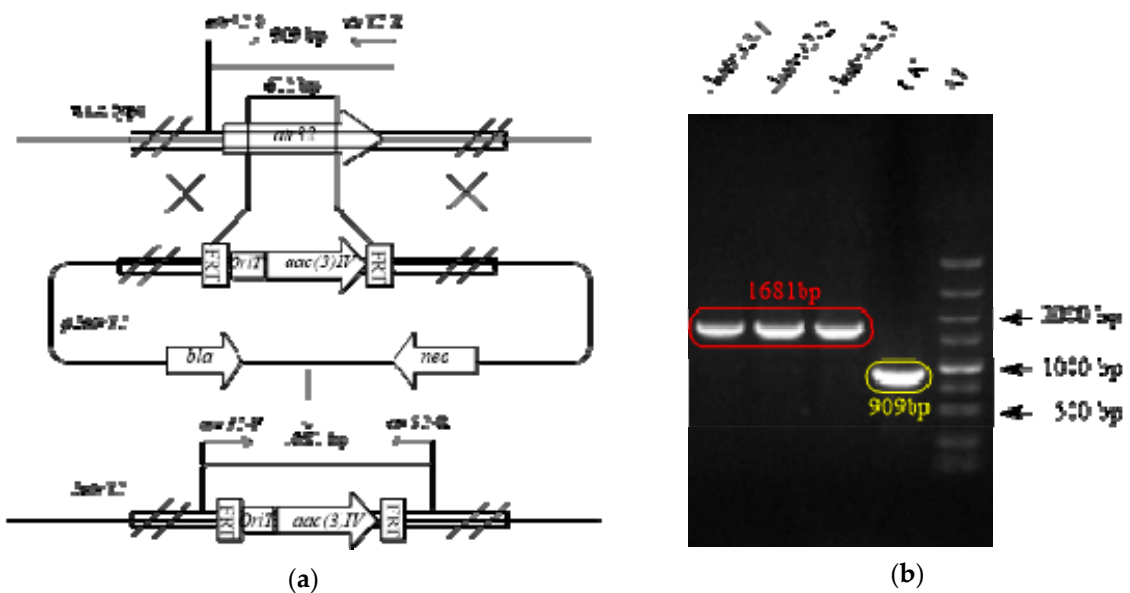

**Figure S5.** Disruption of *atr32* in *S. atratus* SCSIO ZH16NS-80S via PCR-targeting. **a)** Schematic representation for disruption of *atr32*. **b)** PCR analysis of the control strain (*S. atratus* SCSIO ZH16NS-80S) and the *atr32* mutants carried out using primers listed in **Table S2**. M: DNA molecular ladder; CK: using the genomic DNA of *S. atratus* SCSIO ZH16NS-80S as template,  $\Delta atr32$  (1-3): using the genomic DNA of three different colonies of  $\Delta atr32$  mutant as template.

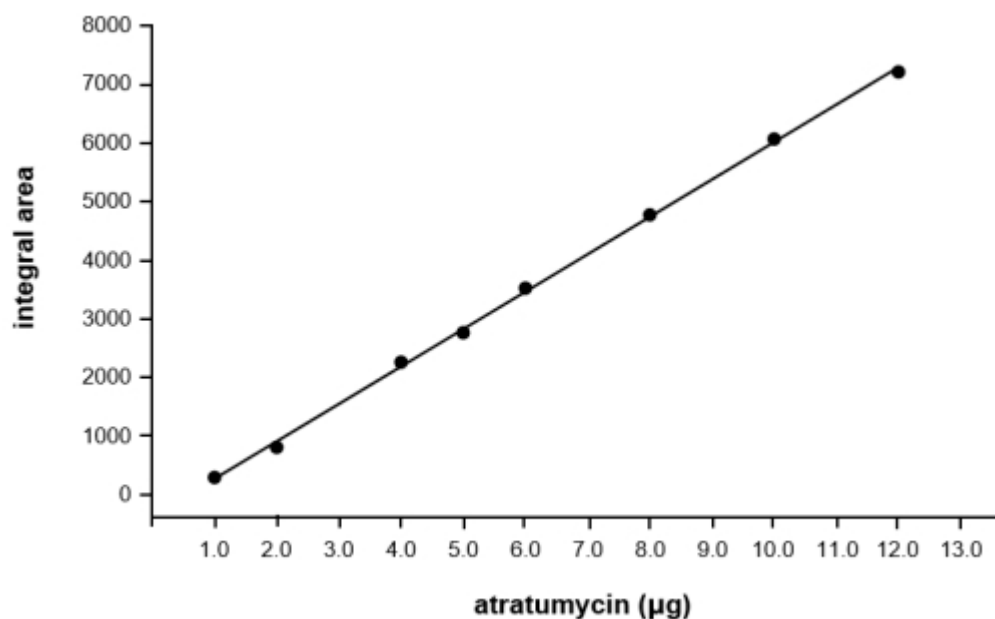

**Figure S6.** The quantitative HPLC standard curve for atratumycin. The curve was generated via analysis of a concentration gradient of 1.0 μg, 2.0 μg, 4.0 μg, 5.0 μg, 6.0 μg, 8.0 μg, 10.0 μg, 12.0 μg of atratumycin. UV absorption was maintained below 1 A unit to ensure appropriate confidence of the generated standard curve and avoid deviation from linearity.

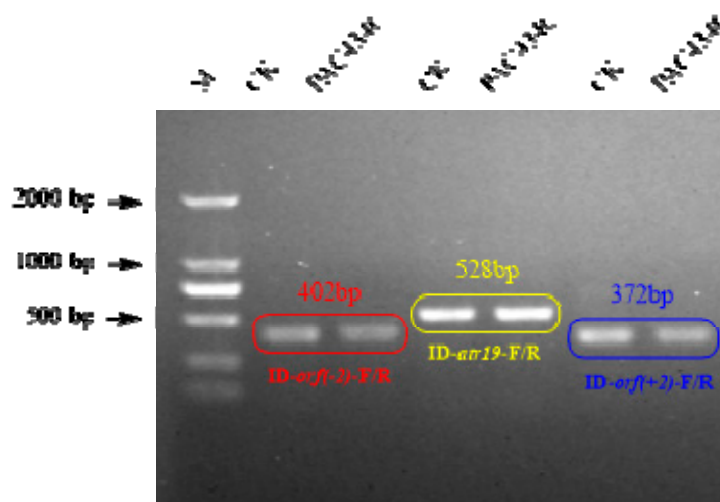

**Figure S7.** PCR verification of PAC434 containing entire *atr* gene cluster. M: DNA molecular ladder; CK: using the genomic DNA of *S. atratus* SCSIO ZH16NS-80S as template.

## References

1. Sun, C.; Yang, Z.; Zhang, C.; Liu, Z.; He, J.; Liu, Q.; Zhang, T.; Ju, J.; Ma, J., Genome Mining of *Streptomyces atratus* SCSIO ZH16: Discovery of Atratumycin and Identification of Its Biosynthetic Gene Cluster. *Organic Letters* **2019**, 21, (5), 1453-1457.



2. Macneil, D. J.; Gewain, K. M.; Ruby, C. L.; Dezeny, G.; Gibbons, P. H.; Macneil, T., Analysis of *Streptomyces avermitilis* genes required for avermectin biosynthesis utilizing a novel integration vector. *Gene* **1992**, 111, (1), 61-68.
3. Datsenko, K. A.; Wanner, B. L., One-step inactivation of chromosomal genes in *Escherichia coli* K-12 using PCR products. *Proceedings of the National Academy of Sciences of the United States of America* **2000**, 97, (12), 6640-6645.
4. Gust, B.; Chandra, G.; Jakimowicz, D.; Tian, Y. Q.; Bruton, C. J.; Chater, K. F., lambda red-mediated genetic manipulation of antibiotic-producing *Streptomyces*. *Advances in Applied Microbiology*, Vol 54 **2004**, 54, 107-128.
5. Paget, M. S. B.; Chamberlin, L.; Atrih, A.; Foster, S. J.; Buttner, M. J., Evidence that the extracytoplasmic function sigma factor sigma(E) is required for normal cell wall structure in *Streptomyces coelicolor* A3(2). *Journal of Bacteriology* **1999**, 181, (1), 204-211.
6. Tu, J.; Li, S.; Chen, J.; Song, Y.; Fu, S.; Ju, J.; Li, Q., Characterization and heterologous expression of the neoabyssomicin/abyssomicin biosynthetic gene cluster from *Streptomyces koyangensis* SCSIO 5802. *Microbial Cell Factories* **2018**, 17, (28), 1-14.
